# Supplementary material for: Effect of phase separation and adsorbed water on power consumption and current efficiency of terpolymer conetwork-based anion exchange membrane
Source: Royal Society of Chemistry journal article supplement (doi:10.1039/c4ta03474k), 2014-07-30
Supplement: c4ta03474k1.pdf [file c4ta03474k1.pdf]

Effect of phase separation and adsorbed water on power consumption and current efficiency of terpolymer conetwork-based anion exchange membrane

<sup>a,c</sup>Uma Chatterjee,\* <sup>a</sup>Vaibhavee Bhadja and <sup>b,c</sup>Suresh K. Jewrajka\*

<sup>a</sup>Electromembrane Processes Division, <sup>b</sup>Reverse Osmosis Discipline, <sup>c</sup>AcSIR -Central Salt & Marine Chemical Research Institute, Bhavnagar, Gujarat

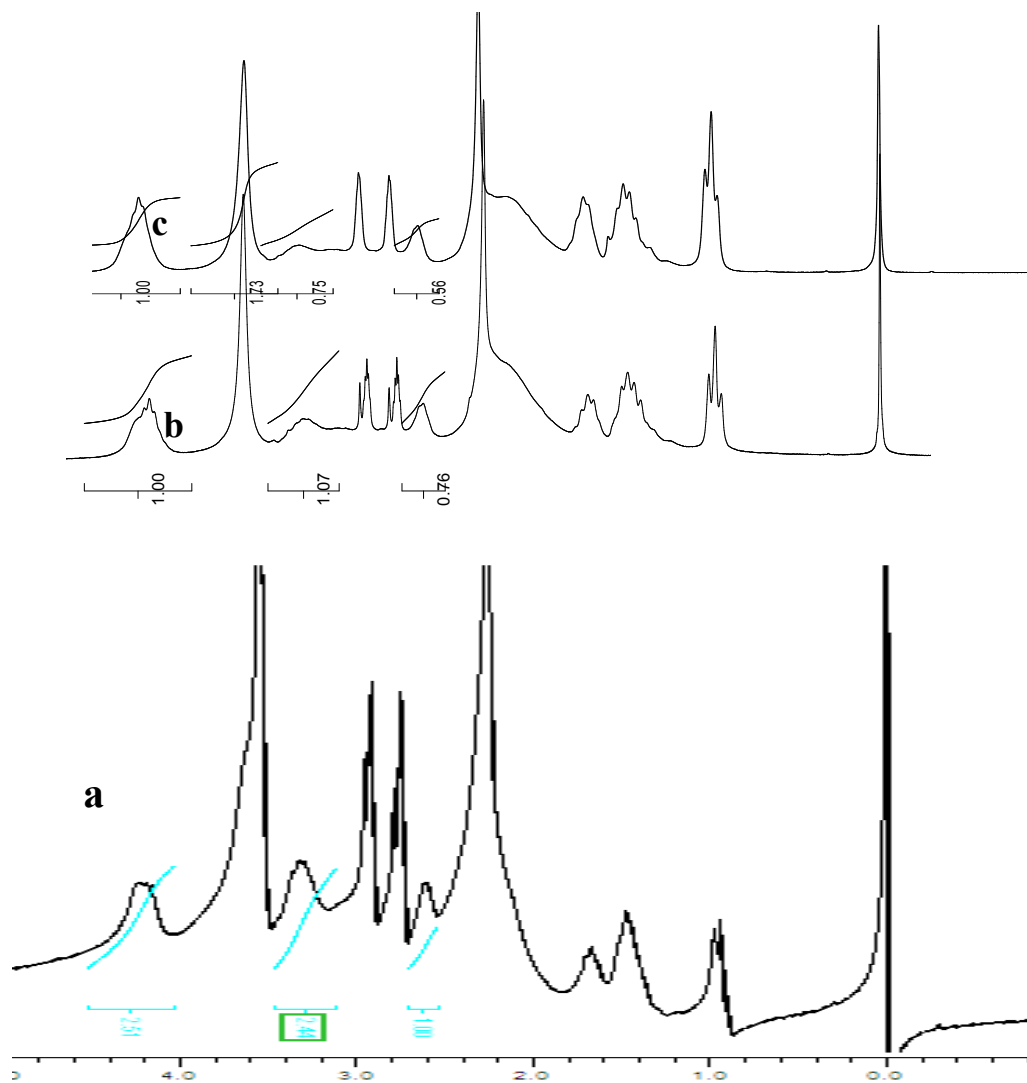

**Fig. S1** <sup>1</sup>H NMR spectra of (a) PAN-co-PnBA-co-PDMA-2, (b) PAN-co-PnBA-co-PDMA-3 and (c) PAN-co-PnBA-co-PDMA-4 copolymers.

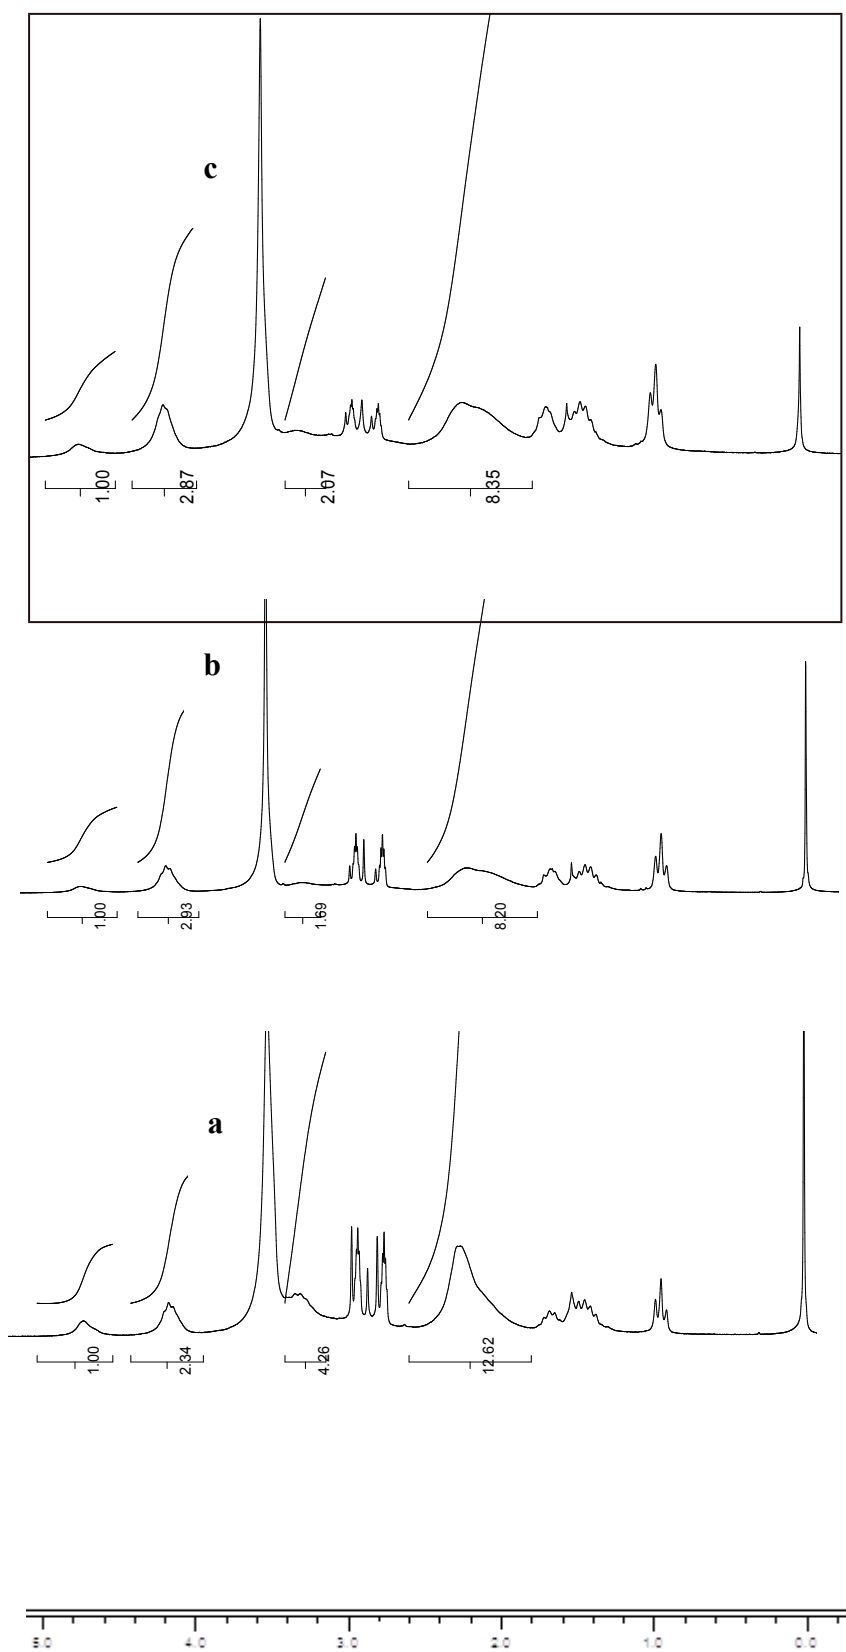

**Fig. S2**  $^1\text{H}$  NMR spectra of (a) PAN-co-PnBA-co-QPDMA-2, (b) PAN-co-PnBA-co-QPDMA-3 and (c) PAN-co-PnBA-co-QPDMA-4 copolymers.

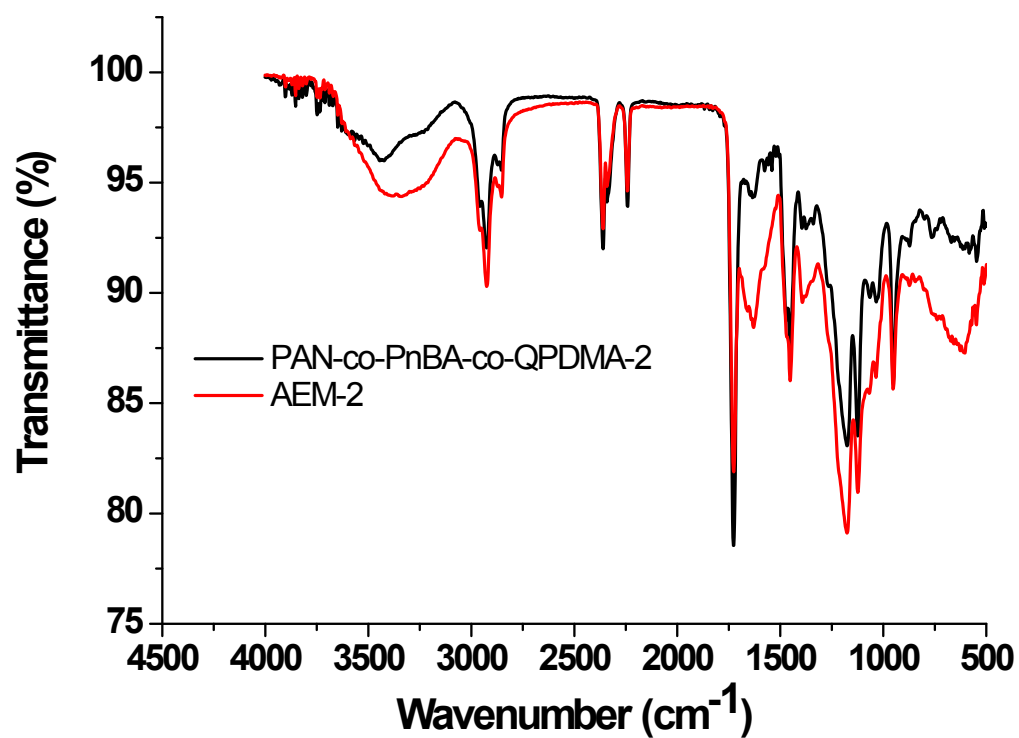

**Fig. S3** ATR-IR spectra of PAN-co-PnBA-co-QPDMA-2 copolymer and corresponding AEM-2.

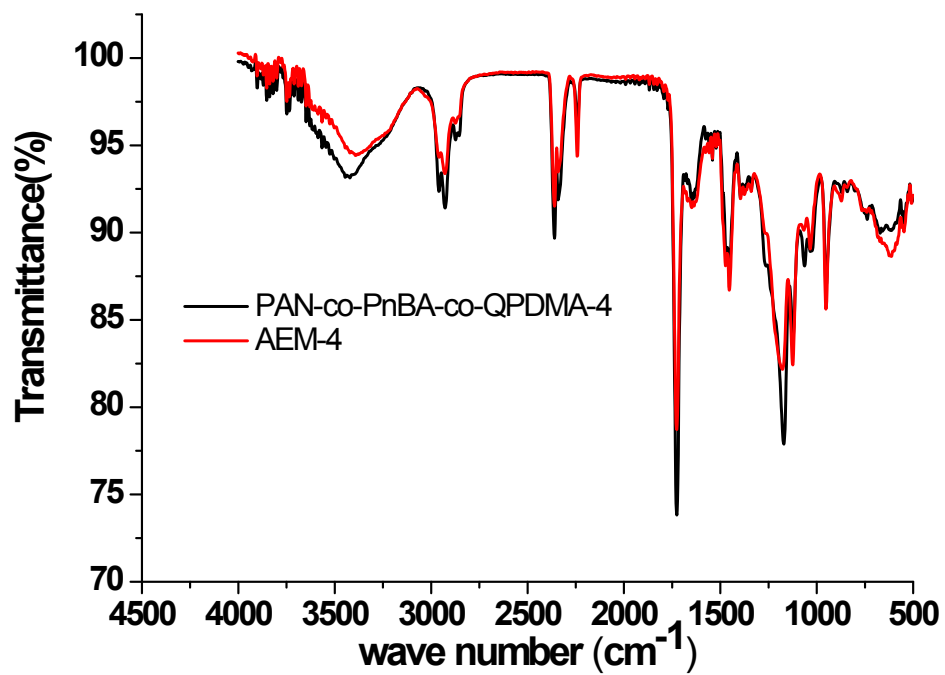

**Fig. S4** ATR-IR spectra of PAN-co-PnBA-co-QPDMA-4 copolymer and corresponding AEM-4.

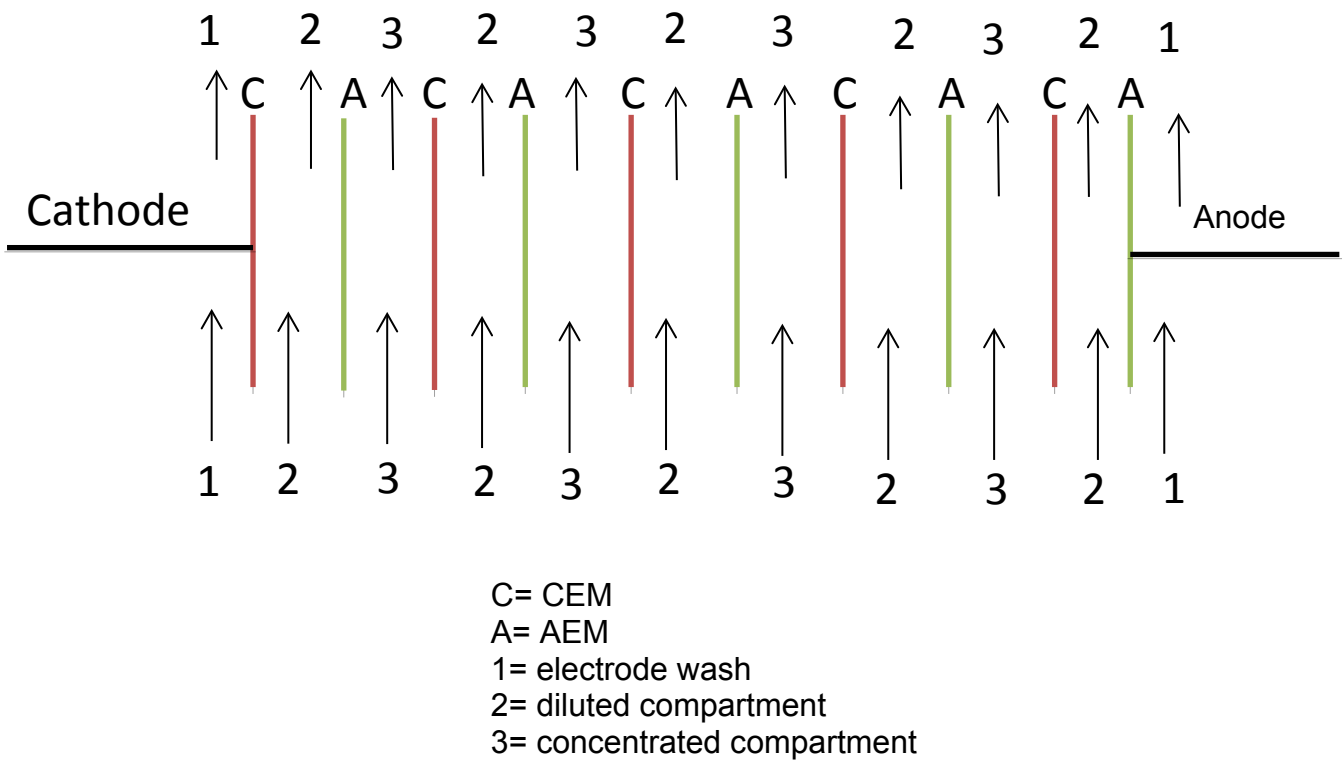

**Fig. S5** Schematic diagram of ED unit.

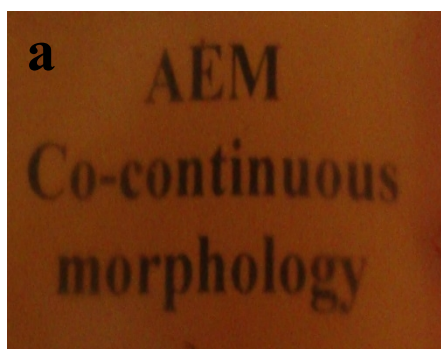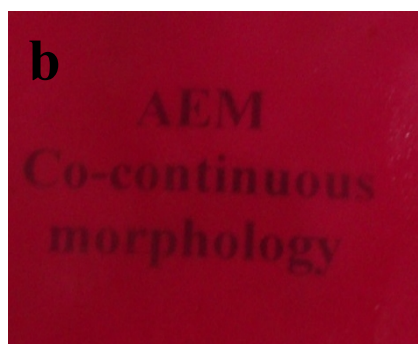

**Fig. S6** Photographs of (a) AEM-2 in water wet state and (b) Rose Bengal dye adsorbed AEM-2 in water wet state.

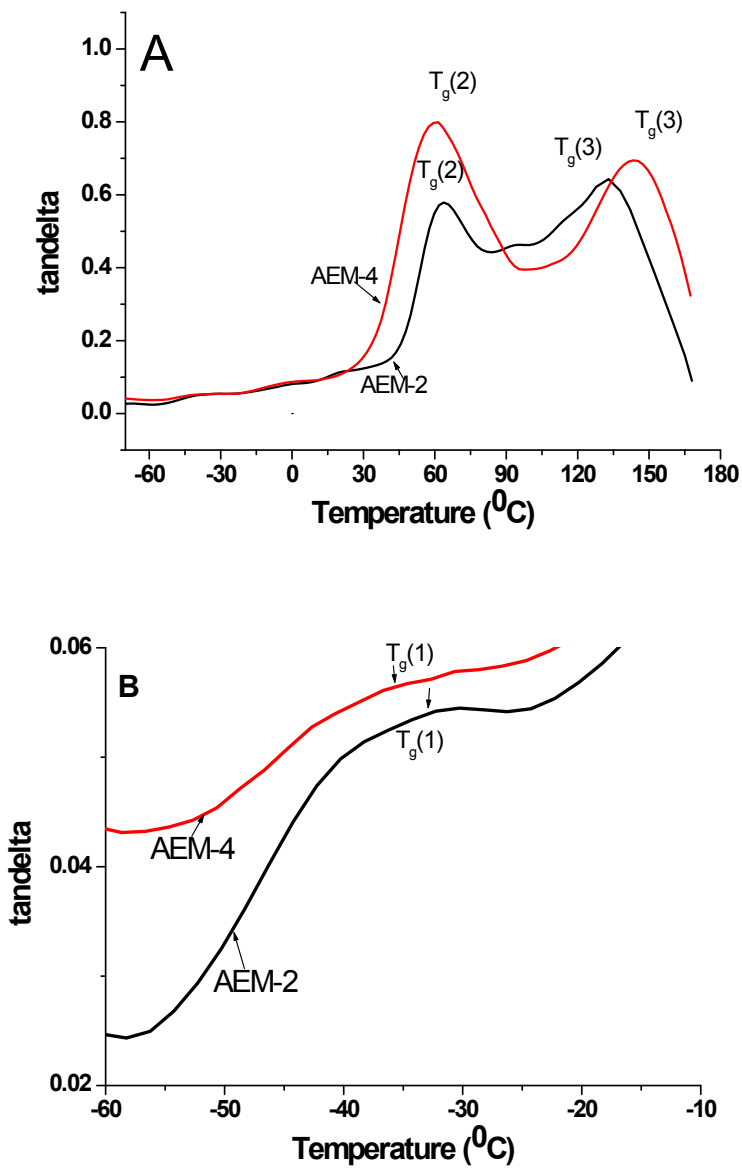

**Fig. S7** (A) Tan delta vs temp plots for AEM-2 and AEM-4 and (B) tan delta vs temp plots in enlarged scale from -60°C to -10°C for AEM-2 and AEM-4.



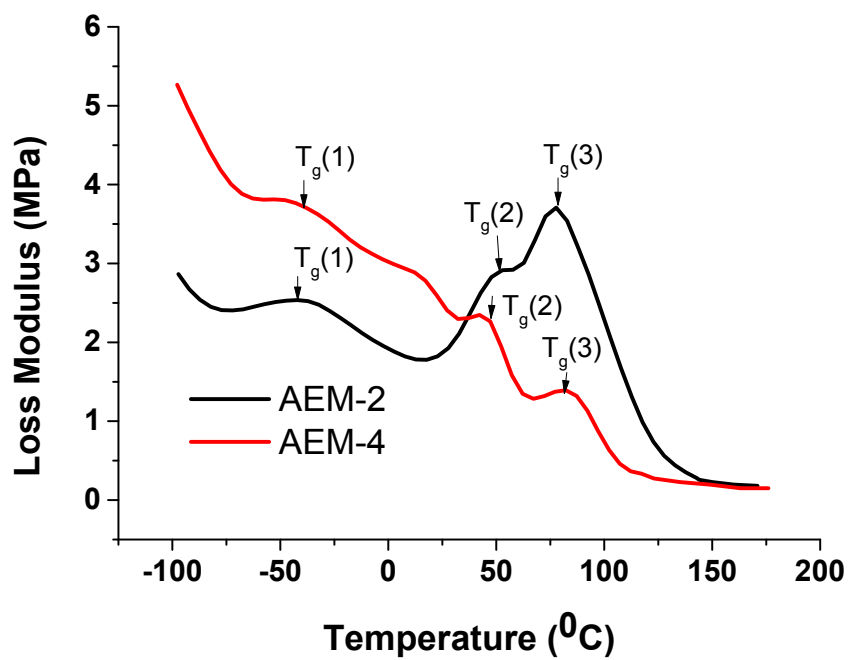

**Fig. S8** Loss modulus vs temperature plots of AEM-2 and AEM-4 after subjected to extraction with DMF for 3 days.

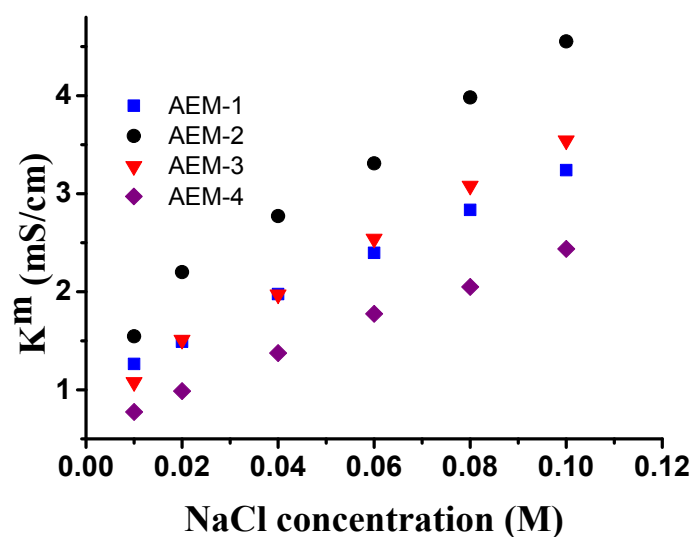

**Fig. S9**  $K^m$  vs NaCl concentration plots for AEM-1, AEM-2, AEM-3 and AEM-4.

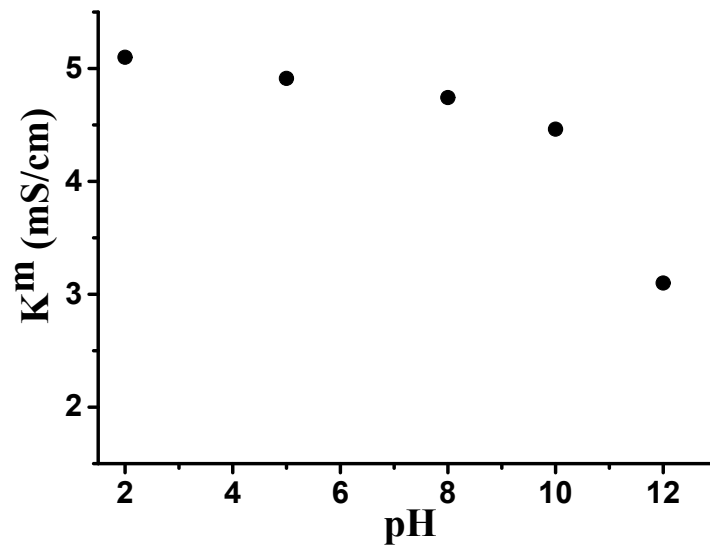

**Fig. S10** Change of  $K^m$  of AEM-2 after subjected to expose in water (containing NaCl 2000 mg/L) at different pH for 24h at room temperature.

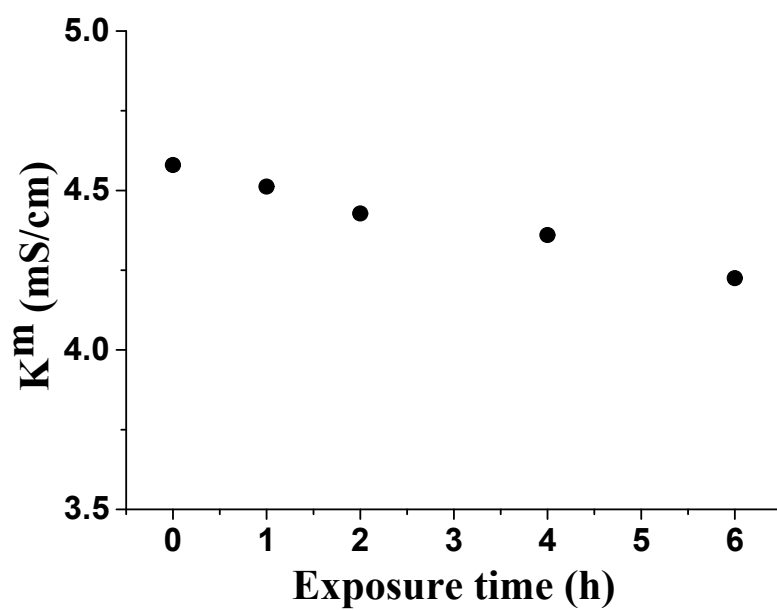

**Fig. S11** Change of  $K^m$  of AEM-2 with different exposure time in water (containing NaCl concentration 2000 mg/L) at temperature 55 °C .

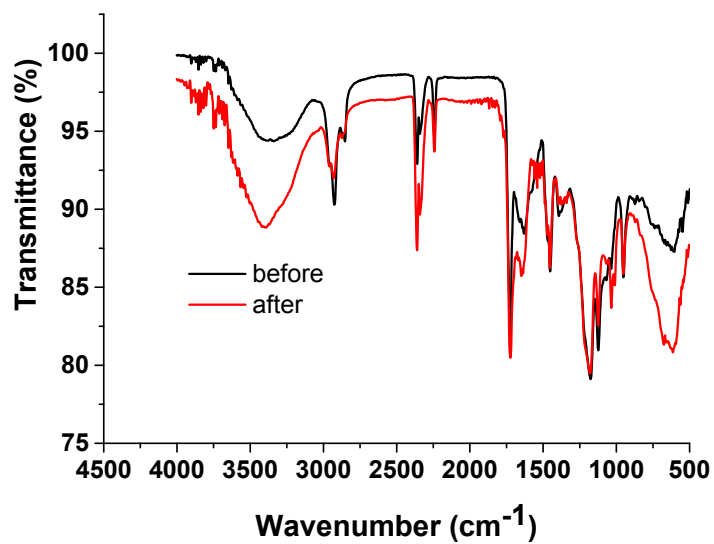

**Fig. S12** ATR-IR spectra of AEM-2 taken before and after subjected exposure with Fenton's reagent at 80°C for 10h.

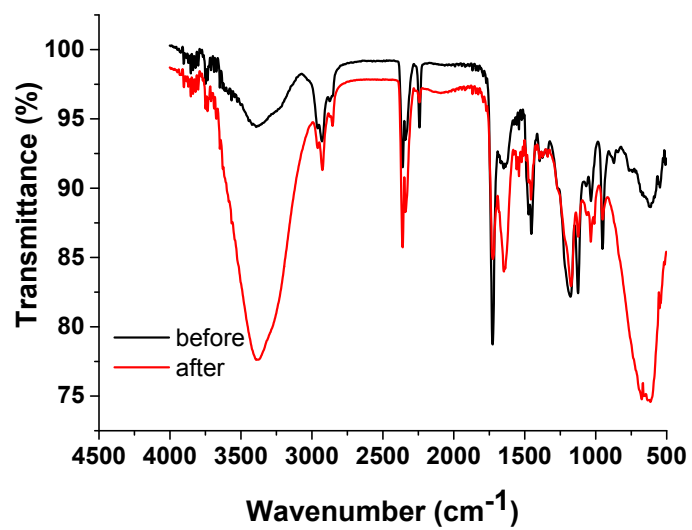

**Fig. S13** ATR-IR spectra of AEM-4 taken before and after subjected to exposure with Fenton's reagent at 80 °C for 10 h.

**Table S1.** Water uptake, W and CE values of different membranes reported in the literatures.

| Entry | Type of AEM                     | Water uptake (%) | W (KWhKg <sup>-1</sup> ) | CE (%)      | Reference (main text) |
|-------|---------------------------------|------------------|--------------------------|-------------|-----------------------|
| 1     | PE/PSt interpolymer             | 15               | 0.808                    | 85.4        | 15                    |
| 2     | PVC/PSt heterogeneous           | 12               | 0.784                    | 87.9        | 15                    |
| 3     | PVA-PVP                         | 28.6             | 4.29                     | 80          | 19                    |
| 4     | PVA/PAN-co-PDMA                 | 22-36            | 10.29-8.90               | 80.14-92.64 | 21                    |
| 5     | PE/PSt interpolymer             | -                | 5.38                     | 60.5        | 18                    |
| 6     | FAB from FumaTech GmbH, Germany | -                | 2.13                     | 57          | 17                    |
| 7     | PVA/ VTMS-co-PDMA               | 35.3-55.5        | 6.01-4.77                | 70.5-78.4   | 20                    |
| 8     | PAN-co-PDMA-a                   | 19               | 1.15                     | 80          | 23                    |
| 9     | PAN-co-PDMA-b                   | 30               | 1.32                     | 72          | 23                    |

**Table S2.** Summary of W, CE and J values of different AEMs evaluated during desalination of water (NaCl concentration 5000mg/L) by ED at different applied potential.

| Type of membrane            | W ( KWhKg <sup>-1</sup> ) |                         | CE (%)                    |                         | (JX10 <sup>4</sup> )Kg/m <sup>2</sup> sec |                         |
|-----------------------------|---------------------------|-------------------------|---------------------------|-------------------------|-------------------------------------------|-------------------------|
|                             | 1.5<br>volts/cell<br>pair | 2<br>volts/cell<br>pair | 1.5<br>volts/cell<br>pair | 2<br>volts/cell<br>pair | 1.5<br>volts/cell<br>pair                 | 2<br>volts/cell<br>pair |
| AEM-1                       | 1.25                      | 1.34                    | 65                        | 71                      | 1.55                                      | 2.95                    |
| AEM-2                       | 0.73                      | 0.99                    | 88                        | 92                      | 1.75                                      | 3.2                     |
| AEM-3                       | 1.28                      | 1.39                    | 63                        | 69                      | 1.53                                      | 2.92                    |
| PAN-co-PDMA-a <sup>23</sup> | 1.07                      | 1.35                    | 65                        | 68                      | 1.60                                      | 2.09                    |
| PAN-co-PDMA-b <sup>23</sup> | 1.23                      | 1.53                    | 58                        | 61                      | 1.51                                      | 1.92                    |
| IONSEP-HC-A<br>(commercial) | 1.02                      | 1.28                    | 69                        | 88                      | 1.65                                      | 2.85                    |



**Table S3.** Physical and electrochemical properties of AEM-R1 and AEM-R2.

| Membrane | Water Uptake (%) | IEC (meq g <sup>-1</sup> ) | t    | K <sup>m</sup> (mS/cm) |
|----------|------------------|----------------------------|------|------------------------|
| AEM-R1   | 17               | 1.50                       | 0.91 | 4.60                   |
| AEM-R2   | 37               | 1.57                       | 0.87 | 4.87                   |

**Table S4:** W and CE values evaluated with AEM-R1 during desalination of water (NaCl concentration 2000 mg/L) by ED at different applied potential.

| Applied volts/cell pair | W (KWhKg <sup>-1</sup> ) | CE(%) |
|-------------------------|--------------------------|-------|
| 1.5                     | 0.67                     | 91    |
| 2.0                     | 0.98                     | 93    |

**Table S5.** Change of  $K_m$ , weight and IEC of AEM-1 to AEM-4 after exposure with Fentons reagent at 80°C for 10 h.

| Membranes                   | $K_m$ loss (%) | Weight loss (%) | IEC loss (%) |
|-----------------------------|----------------|-----------------|--------------|
| AEM-1                       | 9.8            | 8.8             | 3.5          |
| AEM-2                       | 8.0            | 7.6             | 2.9          |
| AEM-3                       | 5.3            | 6.1             | 2.1          |
| AEM-4                       | 4.9            | 5.7             | 1.9          |
| PAN-co-PDMA-a <sup>23</sup> | 14             | 12              | 6            |
